# Supplementary material for: Synthesis of a pyridine-based covalent organic framework as an anode material for lithium-ion batteries
Source: Royal Society of Chemistry journal article supplement (doi:10.1039/d4ta00892h), 2024-01-01
Supplement: d4ta00892h1.pdf [file d4ta00892h1.pdf]

# **Synthesis of pyridine-based covalent organic framework as anode materials for lithium-ion batteries**

Shixi Zhong,<sup>a</sup> He Zhao,<sup>a,b</sup> Yingming Ji,<sup>a</sup> Xiuhua Li,<sup>a</sup> Ting Shu,<sup>a</sup> Zhiming Cui<sup>a</sup> and  
Shijun Liao<sup>a,\*</sup>

*<sup>a</sup>The Key Laboratory of Fuel Cell Technology of Guangdong Province, School of  
Chemistry and Chemical Engineering, South China University of Technology,  
Guangzhou 510641, China*

*<sup>b</sup>School of Chemistry and Chemical Engineering, Dalian University of Technology,  
Dalian 116024, China.*

## **Materials**

1,3,5-triformylphloroglucinol (Tp), 2,2'-bipyridine-5,5'-diamine (Bpy) were purchased from Jilin Chinese Academy of Sciences-Yanshen Technology Co., Ltd. Other reagents including 1,4-dioxane, mesitylene, N,N-dimethylformamide (DMF), tetrahydrofuran (THF), N-Methylpyrrolidone (NMP), acetic acid, etc. were purchased from Sigma-Aldrich Inc. The electrolyte (1 M LiPF<sub>6</sub> in EC/DEC, v:v = 1:1) used in the electrochemical measurements was purchased from DoDoChem. None of the reagents mentioned above underwent further purification.

## Supporting Figures and Tables

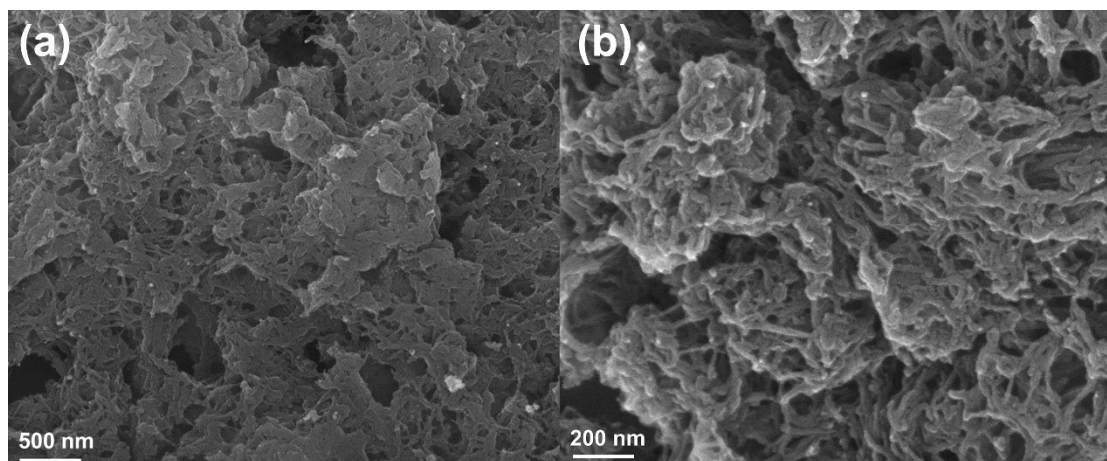

**Fig. S1** SEM images of TpBpy before ball milling.

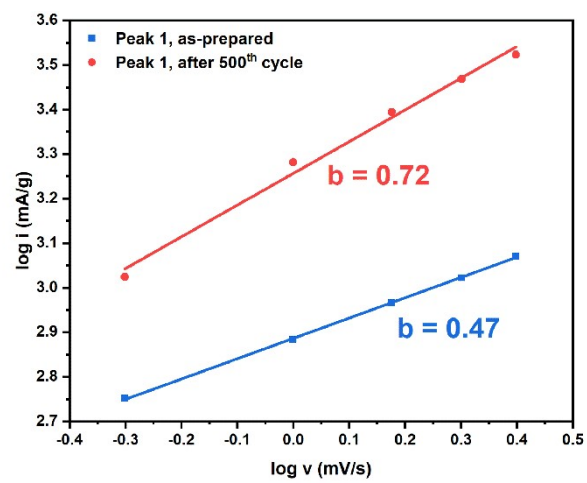

**Fig. S2** Plots of log current vs. log scan rate to determine the  $b$  values of Peak 1 of TpBpy as-prepared and after the 500<sup>th</sup> cycle

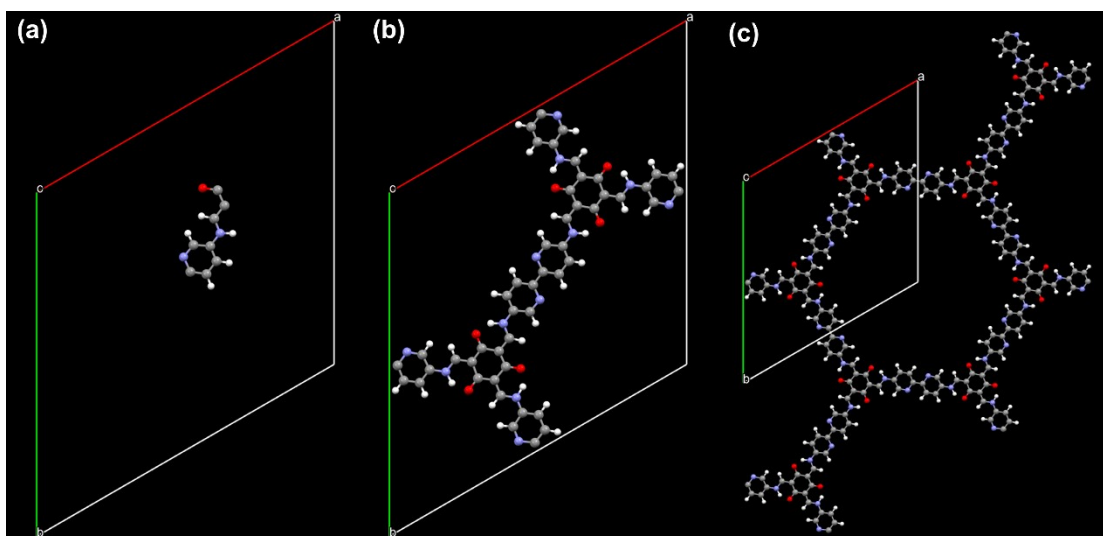

**Fig. S3** The (a) asymmetric unit, (b) unit cell, and (c) eclipsed crystal lattice packing of TpBpy.

| TpBpy                                        |        |        |        |
|----------------------------------------------|--------|--------|--------|
| Hexagonal, <i>P</i> 6                        |        |        |        |
| a=b=29.00 Å, c=3.57 Å                        |        |        |        |
| $\alpha=\beta=90^\circ$ , $\gamma=120^\circ$ |        |        |        |
| C1                                           | 0.5167 | 0.4893 | 0.4754 |
| C2                                           | 0.5709 | 0.523  | 0.4751 |
| C3                                           | 0.6043 | 0.5022 | 0.4751 |
| C4                                           | 0.5271 | 0.4165 | 0.4753 |
| C5                                           | 0.5833 | 0.4479 | 0.4753 |
| C6                                           | 0.597  | 0.3745 | 0.4751 |
| C7                                           | 0.6314 | 0.3539 | 0.4765 |
| C8                                           | 0.6085 | 0.2978 | 0.4754 |
| N1                                           | 0.4938 | 0.4347 | 0.4767 |
| N2                                           | 0.6166 | 0.427  | 0.4751 |
| O1                                           | 0.5583 | 0.2667 | 0.4751 |
| H1                                           | 0.5861 | 0.5657 | 0.4587 |
| H2                                           | 0.5083 | 0.3731 | 0.4755 |
| H3                                           | 0.6471 | 0.5284 | 0.4515 |
| H4                                           | 0.5541 | 0.3458 | 0.4523 |
| H5                                           | 0.6592 | 0.4489 | 0.46   |

**Table S1** Fractional atomic coordinates for the asymmetric unit of TpBpy.

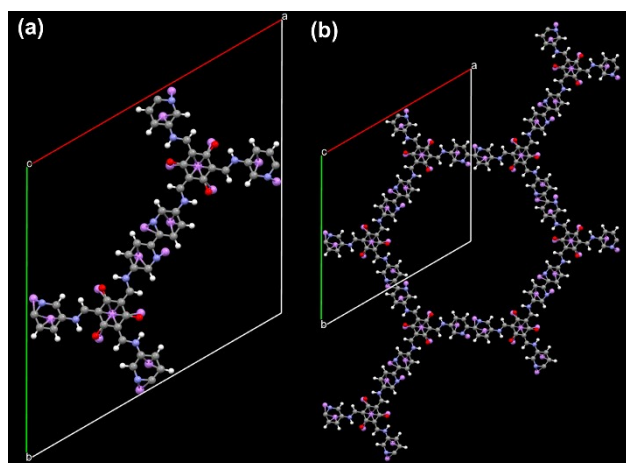

**Fig. S4** The (a) unit cell, and (b) eclipsed crystal lattice packing of 20Li-TpBpy.

| 20Li-TpBpy                                                       |          |          |          |
|------------------------------------------------------------------|----------|----------|----------|
| Triclinic, <i>P</i> 1                                            |          |          |          |
| a=30.15 Å, b=30.04 Å, c=3.60 Å                                   |          |          |          |
| $\alpha=90.02^\circ$ , $\beta=90.04^\circ$ $\gamma=120.12^\circ$ |          |          |          |
| C1                                                               | 0.519986 | 0.49209  | 0.174428 |
| C2                                                               | 0.575398 | 0.525739 | 0.174686 |
| C3                                                               | 0.607094 | 0.502856 | 0.173147 |
| C4                                                               | 0.530412 | 0.416936 | 0.149682 |
| C5                                                               | 0.584579 | 0.447187 | 0.149656 |
| C6                                                               | 0.601869 | 0.375739 | 0.149473 |
| C7                                                               | 0.636593 | 0.357151 | 0.144936 |
| C8                                                               | 0.615102 | 0.301484 | 0.124948 |
| C9                                                               | 0.512595 | 0.028941 | 0.14867  |
| C10                                                              | 0.480078 | 0.049702 | 0.125028 |
| C11                                                              | 0.500265 | 0.10429  | 0.164615 |
| C12                                                              | 0.587333 | 0.114975 | 0.174731 |
| C13                                                              | 0.556219 | 0.136878 | 0.173325 |
| C14                                                              | 0.626919 | 0.224296 | 0.174688 |
| C15                                                              | 0.648341 | 0.279072 | 0.147995 |
| C16                                                              | 0.704388 | 0.31355  | 0.125244 |
| C17                                                              | 0.97603  | 0.485094 | 0.172904 |
| C18                                                              | 0.953309 | 0.42966  | 0.150266 |
| C19                                                              | 0.900611 | 0.39684  | 0.174172 |
| C20                                                              | 0.890067 | 0.476061 | 0.173735 |
| C21                                                              | 0.868153 | 0.421351 | 0.150935 |
| C22                                                              | 0.779952 | 0.404174 | 0.149548 |
| C23                                                              | 0.726333 | 0.369322 | 0.144854 |
| C24                                                              | 0.692392 | 0.390847 | 0.124986 |
| C25                                                              | 0.487462 | 0.512346 | 0.149737 |
| C26                                                              | 0.432477 | 0.47821  | 0.125031 |
| C27                                                              | 0.399462 | 0.500231 | 0.14827  |
| C28                                                              | 0.476092 | 0.586371 | 0.174521 |
| C29                                                              | 0.420741 | 0.555503 | 0.174306 |
| C30                                                              | 0.404471 | 0.627734 | 0.174234 |
| C31                                                              | 0.370425 | 0.647441 | 0.158055 |
| C32                                                              | 0.390029 | 0.70268  | 0.124919 |
| C33                                                              | 0.491283 | 0.973527 | 0.173374 |
| C34                                                              | 0.526234 | 0.953422 | 0.164893 |
| C35                                                              | 0.505189 | 0.89876  | 0.148476 |
| C36                                                              | 0.418575 | 0.890873 | 0.174264 |
| C37                                                              | 0.448552 | 0.867161 | 0.125631 |
| C38                                                              | 0.376204 | 0.779667 | 0.149191 |
| C39                                                              | 0.357456 | 0.725865 | 0.147118 |



|     |          |          |          |
|-----|----------|----------|----------|
| C40 | 0.302827 | 0.690549 | 0.150679 |
| C41 | 0.02972  | 0.518382 | 0.1506   |
| C42 | 0.051659 | 0.57341  | 0.174357 |
| C43 | 0.106447 | 0.606678 | 0.149359 |
| C44 | 0.115824 | 0.529652 | 0.173611 |
| C45 | 0.138418 | 0.583862 | 0.151451 |
| C46 | 0.22702  | 0.601351 | 0.151302 |
| C47 | 0.281642 | 0.634955 | 0.173964 |
| C48 | 0.315509 | 0.613722 | 0.15052  |
| N1  | 0.497065 | 0.437657 | 0.164607 |
| N2  | 0.618444 | 0.428191 | 0.148884 |
| N3  | 0.567504 | 0.059644 | 0.167057 |
| N4  | 0.573704 | 0.188614 | 0.174979 |
| N5  | 0.945054 | 0.509303 | 0.164756 |
| N6  | 0.815506 | 0.387282 | 0.145928 |
| N7  | 0.509865 | 0.567332 | 0.174749 |
| N8  | 0.388862 | 0.57546  | 0.174833 |
| N9  | 0.436588 | 0.944427 | 0.174832 |
| N10 | 0.42834  | 0.815299 | 0.145149 |
| N11 | 0.059846 | 0.494179 | 0.14602  |
| N12 | 0.192373 | 0.617111 | 0.174541 |
| O1  | 0.561754 | 0.266087 | 0.124704 |
| O2  | 0.737954 | 0.294664 | 0.173996 |
| O3  | 0.713059 | 0.443945 | 0.124527 |
| O4  | 0.442367 | 0.735877 | 0.124576 |
| O5  | 0.270054 | 0.712311 | 0.17457  |
| O6  | 0.29569  | 0.561684 | 0.174533 |
| H1  | 0.593441 | 0.567874 | 0.149459 |
| H2  | 0.509751 | 0.375786 | 0.192133 |
| H3  | 0.647862 | 0.526481 | 0.144416 |
| H4  | 0.561225 | 0.348736 | 0.194605 |
| H5  | 0.65809  | 0.451138 | 0.141737 |
| H6  | 0.438124 | 0.025439 | 0.099483 |
| H7  | 0.62927  | 0.1391   | 0.199291 |
| H8  | 0.477661 | 0.123388 | 0.140801 |
| H9  | 0.652853 | 0.209148 | 0.195093 |
| H10 | 0.551408 | 0.204582 | 0.149019 |
| H11 | 0.978904 | 0.414343 | 0.144453 |
| H12 | 0.866012 | 0.493924 | 0.197082 |
| H13 | 0.882726 | 0.354757 | 0.149217 |
| H14 | 0.793812 | 0.444844 | 0.199317 |
| H15 | 0.799088 | 0.347755 | 0.147164 |
| H16 | 0.414564 | 0.436136 | 0.149298 |

|      |          |          |          |
|------|----------|----------|----------|
| H17  | 0.494063 | 0.628347 | 0.198558 |
| H18  | 0.358729 | 0.4739   | 0.149179 |
| H19  | 0.444202 | 0.653635 | 0.141969 |
| H20  | 0.348452 | 0.55062  | 0.14938  |
| H21  | 0.567835 | 0.980452 | 0.149463 |
| H22  | 0.376684 | 0.866778 | 0.14932  |
| H23  | 0.52711  | 0.879573 | 0.141819 |
| H24  | 0.351157 | 0.795017 | 0.198587 |
| H25  | 0.450809 | 0.798663 | 0.097373 |
| H26  | 0.027771 | 0.591264 | 0.174512 |
| H27  | 0.139918 | 0.511919 | 0.197205 |
| H28  | 0.121285 | 0.64731  | 0.149328 |
| H29  | 0.212193 | 0.56104  | 0.199332 |
| H30  | 0.206392 | 0.656736 | 0.125241 |
| Li1  | 0.447938 | 0.723455 | 0.603296 |
| Li2  | 0.284164 | 0.728468 | 0.652798 |
| Li3  | 0.281232 | 0.557915 | 0.65354  |
| Li4  | 0.728991 | 0.444767 | 0.604443 |
| Li5  | 0.723995 | 0.280806 | 0.652595 |
| Li6  | 0.561306 | 0.278337 | 0.605098 |
| Li7  | 0.543811 | 0.563441 | 0.648841 |
| Li8  | 0.461103 | 0.438971 | 0.647402 |
| Li9  | 0.567373 | 0.02754  | 0.649179 |
| Li10 | 0.444482 | 0.983657 | 0.647719 |
| Li11 | 0.026127 | 0.46255  | 0.645288 |
| Li12 | 0.980384 | 0.543364 | 0.648997 |
| Li13 | 0.479813 | 0.912498 | 0.646049 |
| Li14 | 0.335525 | 0.670523 | 0.64724  |
| Li15 | 0.094395 | 0.566671 | 0.646543 |
| Li16 | 0.438798 | 0.52618  | 0.647955 |
| Li17 | 0.563751 | 0.472124 | 0.649702 |
| Li18 | 0.670662 | 0.335002 | 0.643041 |
| Li19 | 0.909486 | 0.442175 | 0.649579 |
| Li20 | 0.533339 | 0.096573 | 0.651439 |

**Table S2** Fractional atomic coordinates for the unit cell of 20Li-TpBpy.

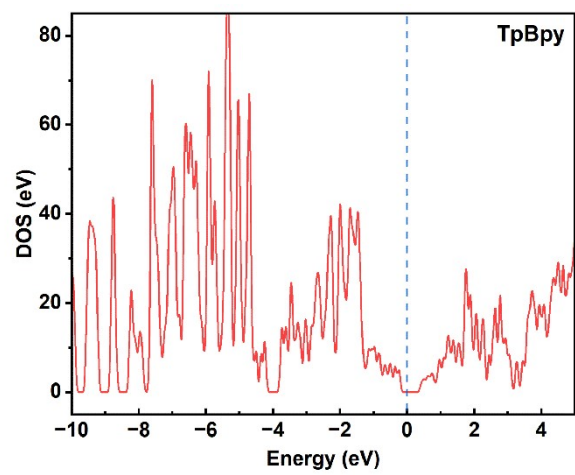

**Fig. S5** The electron DOS of TpBpy.

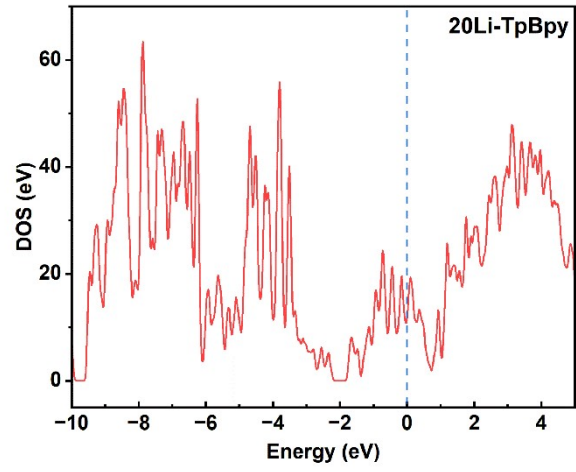

**Fig. S6** The electron DOS of 20Li-TpBpy.
